# Supplementary material for: Boosting hydrogen and oxygen evolution reactions on electrodeposited nickel electrodes via simultaneous mesoporosity, magnetohydrodynamics and high gradient magnetic force
Source: Royal Society of Chemistry journal article supplement (doi:10.1039/d0ta06906j), 2020-01-01
Supplement: d0ta06906j1.pdf [file d0ta06906j1.pdf]

## Supplementary Data

### **Boosting hydrogen and oxygen evolution on nickel electrodes via simultaneous mesoporosity, magnetohydrodynamics and high gradient magnetic force**

Amir Ali Farmani and Farzad Nasirpour

Supplementary document provides information on the high cycle CVs demonstrating the HER and OER performance of the Ni electrodes, Experimental details of electrochemical tests, Comprehensive HER and OER performance data for various electrode materials reported in the literature, and calculation method of high gradient magnetic fields.

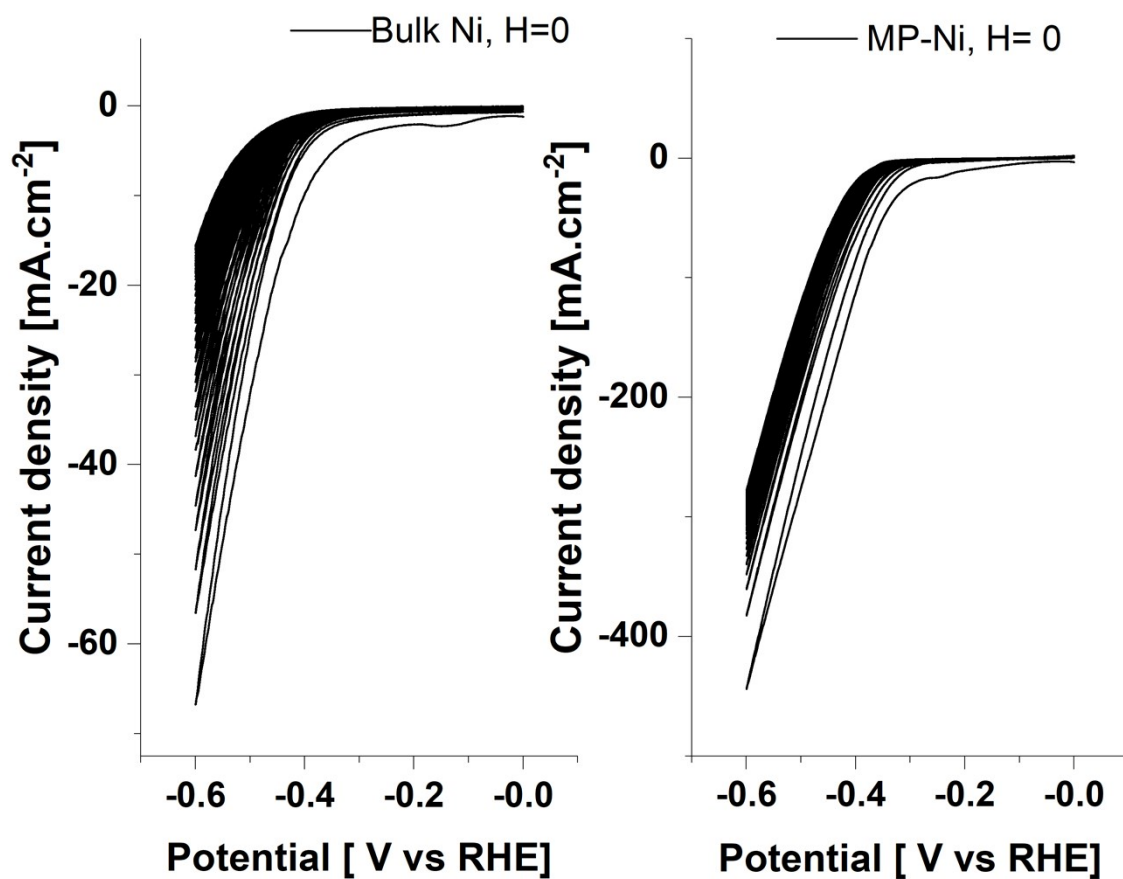

**Figure S1** Cyclic voltammograms of HER for bulk and mesoporous Ni electrodes in the absence of magnetic field.

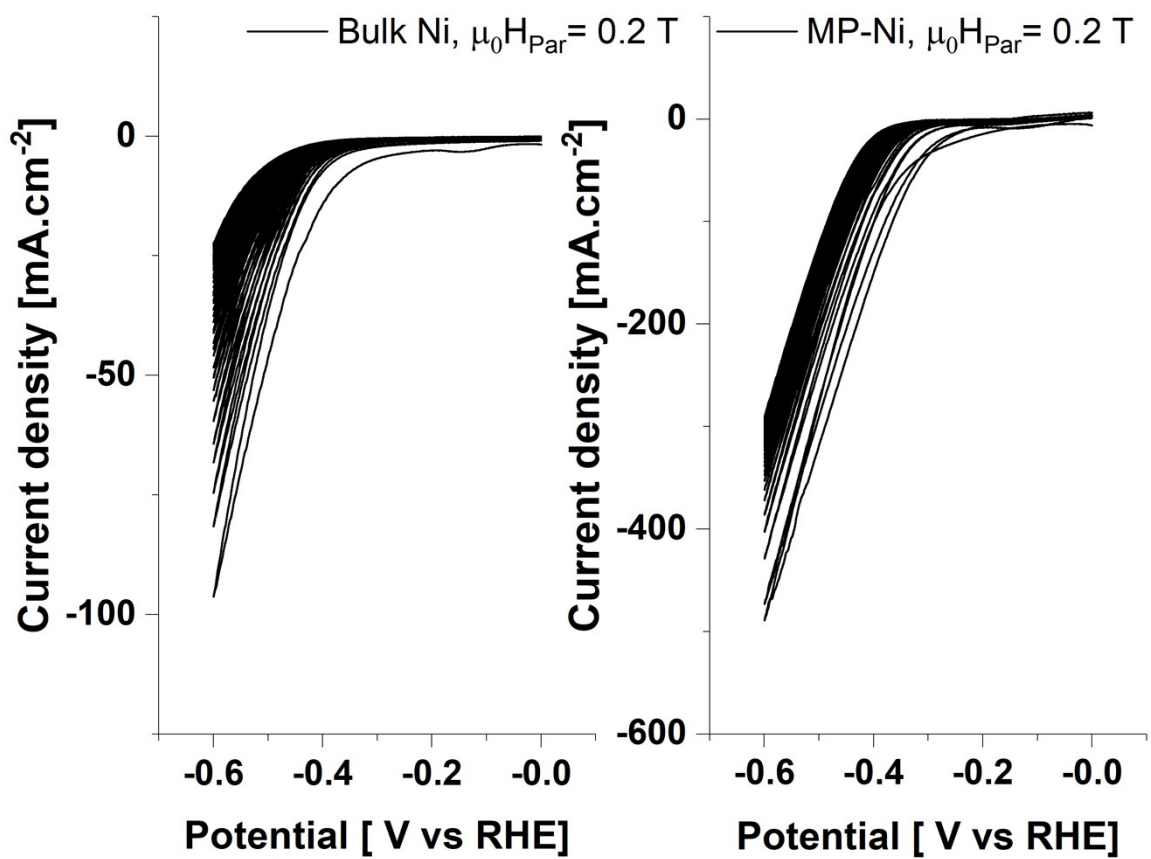

**Figure S2** Cyclic voltammograms of HER for bulk and mesoporous Ni electrodes in the absence of magnetic field applied parallel to the electrical field.

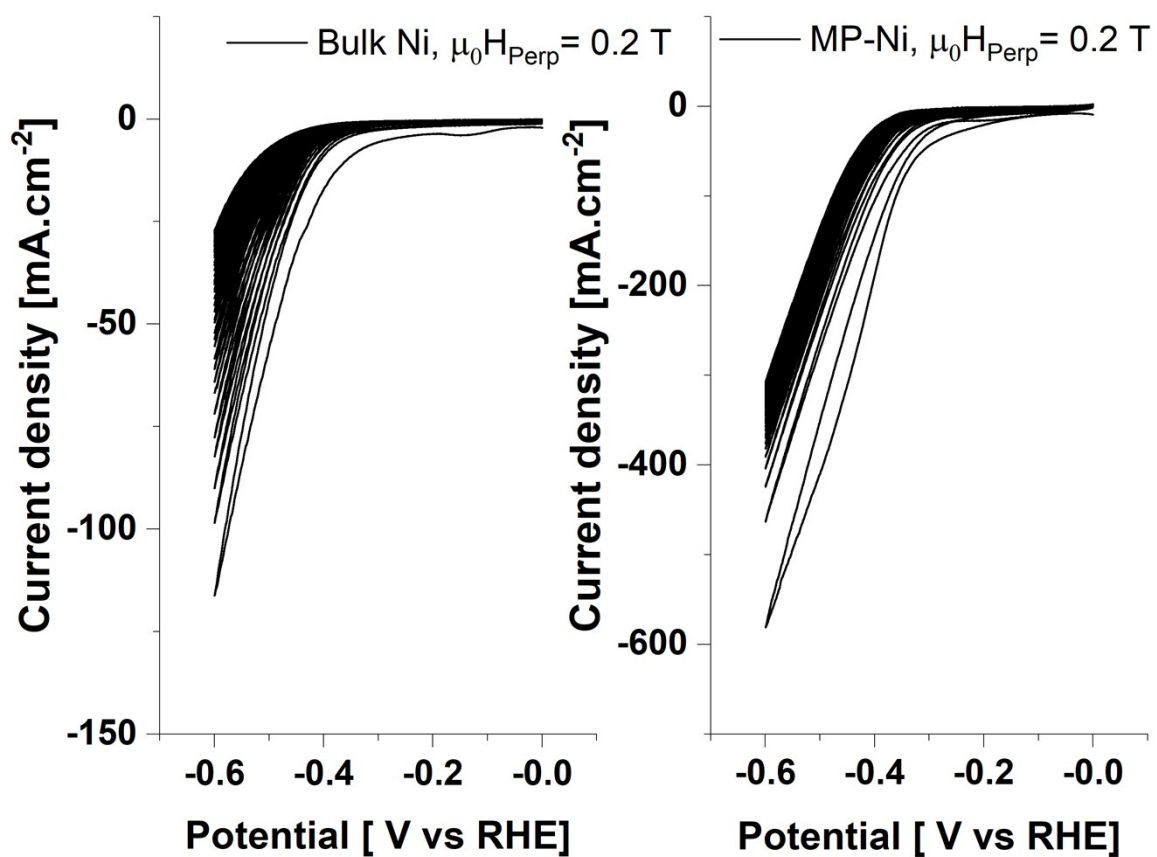

**Figure S3** Cyclic voltammograms of HER for bulk and mesoporous Ni electrodes in the absence of magnetic field applied perpendicular to the electrical field.

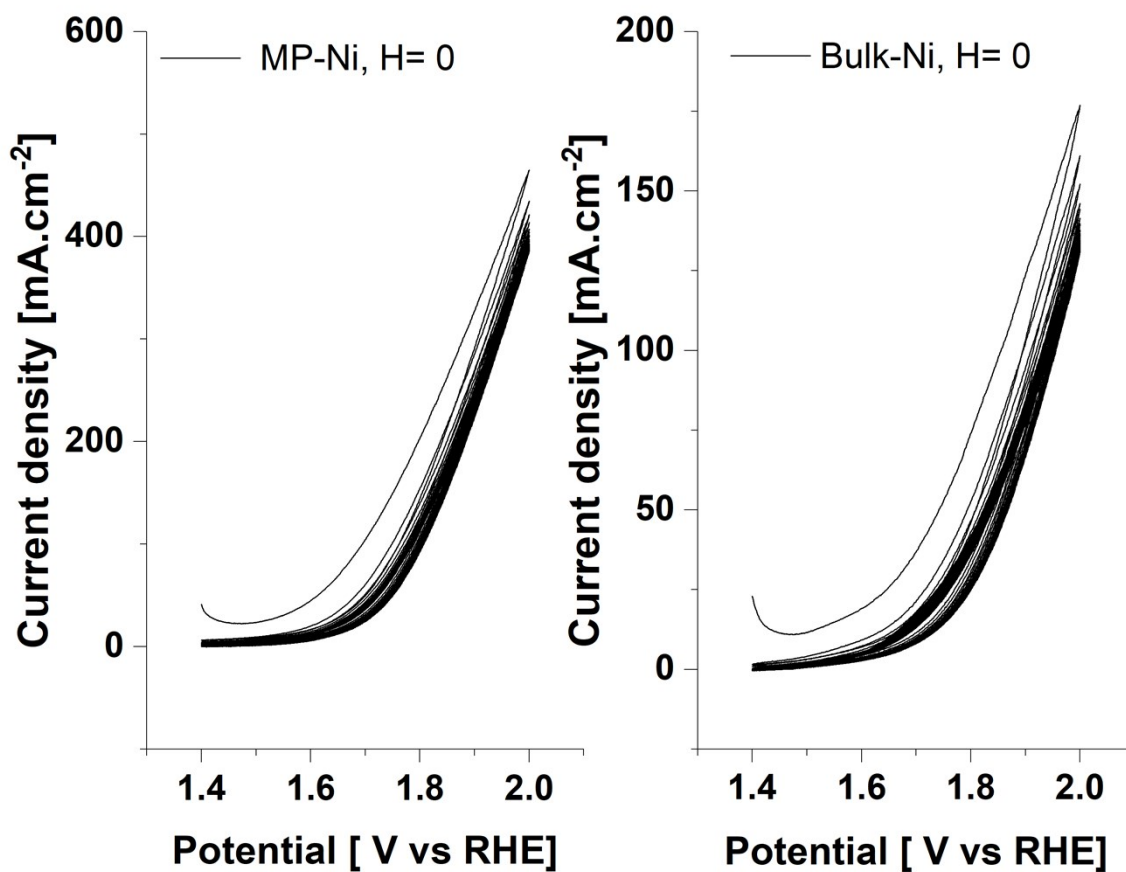

**Figure S4** Cyclic voltammograms of OER for bulk and mesoporous Ni electrodes in the absence of magnetic field.

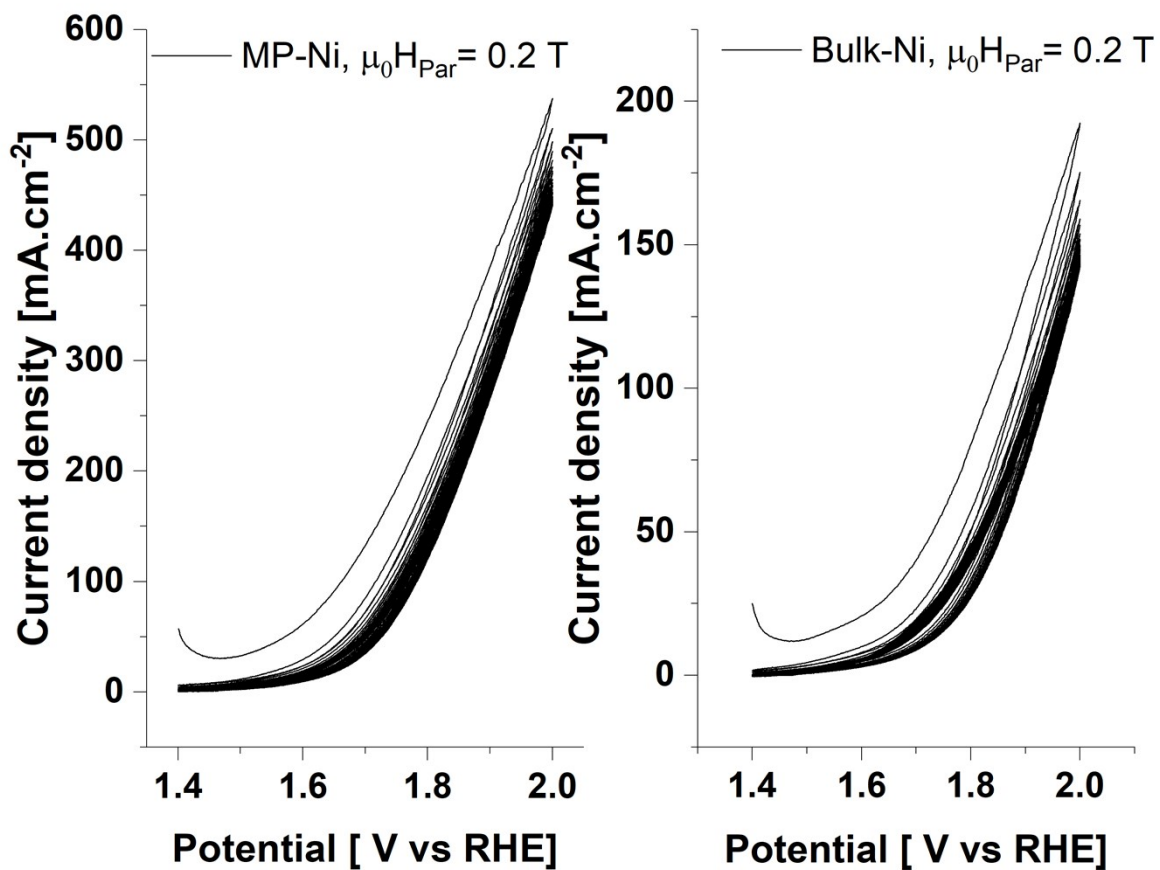

**Figure S5** Cyclic voltammograms of OER for bulk and mesoporous Ni electrodes in the absence of magnetic field applied parallel to the electrical field

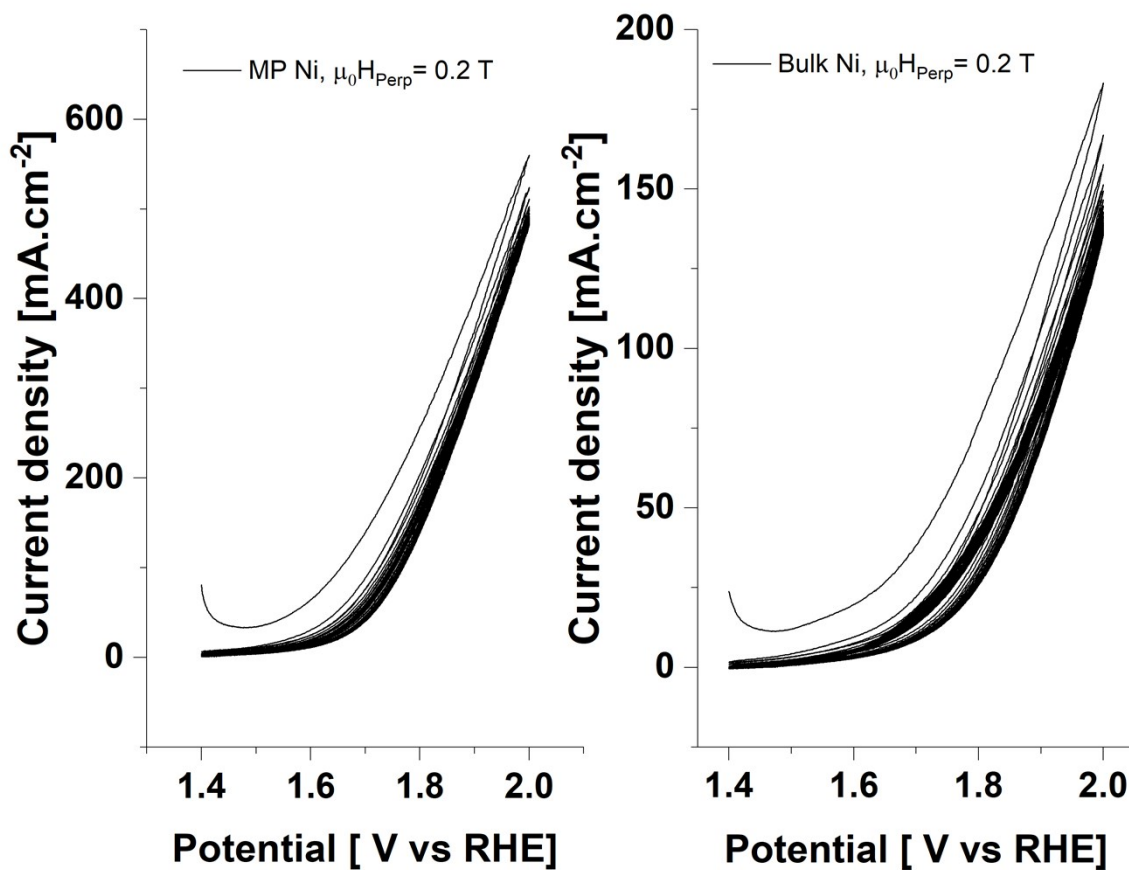

**Figure S6** Cyclic voltammograms of OER for bulk and mesoporous Ni electrodes in the absence of magnetic field applied perpendicular to electrical field

Table S1 Electrochemical test parameters for OER and HER.

| Reaction | Electrochemical test | Conditions                                                          |
|----------|----------------------|---------------------------------------------------------------------|
| HER      | LSV                  | -525 mV to -1700 mV vs SCE 1 mV.s <sup>-1</sup>                     |
|          | CV                   | -1.0 to -1.6 V vs SCE 50mV/s-50 cycles                              |
|          | CA                   | -1.6 V vs SCE                                                       |
|          | EIS                  | 10 kHz to 1 Hz<br>Amplitude: 5mV<br>-1.4 V vs SCE<br>-400 mV vs RHE |
| OER      | LSV                  | -725 mV to 800 mV vs SCE mV.s <sup>-1</sup>                         |
|          | CV                   | 0.4-1.0 V vs SCE 50mV/s-50 cycles                                   |
|          | CA                   | 1 V vs SCE                                                          |
|          | EIS                  | 10 kHz to 1Hz<br>Amplitude: 5mV<br>0.8 V vs SCE<br>1.8 V vs RHE     |



Table S2 Comparison of HER and OER activity from various reported electrocatalysts.

| Reaction            | Electrode                                | Overpotential<br>10mA/cm | Tafel slope | Reference  |
|---------------------|------------------------------------------|--------------------------|-------------|------------|
| HER                 | NiO                                      | 710                      | 100         | [49]       |
|                     | Co <sub>3</sub> O <sub>4</sub>           | 800                      | 139         | [49]       |
|                     | NiS/NC                                   | 129                      | 78          | [62]       |
|                     | Ni/NiS/NC                                | 70                       | 45          | [62]       |
|                     | Ni/NC                                    | 94                       | 57          | [62]       |
|                     | Ni dendrite                              | 441                      | 102         | [22]       |
|                     | Ni particle                              | 446                      | 119         | [22]       |
|                     | Ni film                                  | 448                      | 98          | [22]       |
|                     | Ni foil                                  | 554                      | 300         | [22]       |
|                     | NiFeOF                                   | 253                      | -           | [65]       |
|                     | NiFe-NCs                                 | 197                      | 130         | [64]       |
|                     | Pt/C                                     | 20                       | -           | [49], [64] |
|                     | NiFe-NPs                                 | 374                      | 197         | [64]       |
|                     | Fe <sub>2</sub> O <sub>3</sub> NPs       | 424                      | 158         | [64]       |
|                     | Nio Nps                                  | 576                      | 236         | [64]       |
|                     | CoSe <sub>2</sub> /DETA                  | 386                      | 107         | [63]       |
|                     | Co <sub>2</sub> B                        | 350                      | 78          | [63]       |
|                     | Co <sub>2</sub> B/CoSe <sub>2</sub>      | 300                      | 76          | [63]       |
|                     | Cu@NC NT/CF                              | 123                      | 63          | [67]       |
|                     | Cu 0.3 Co 2.7 P/NC                       | 220                      | 122         | [68]       |
| Ru@C <sub>2</sub> N | 22                                       | 30                       | [69]        |            |
| OER                 | Ru <sub>2</sub> O                        | 210                      | 151         | [49]       |
|                     | NiO                                      | 530                      | 170         | [49]       |
|                     | Co <sub>3</sub> O <sub>4</sub>           |                          | 287         | [49]       |
|                     | NiS/NC                                   | 371                      | 75          | [62]       |
|                     | Ni/NiS/NC                                | 337                      | 52          | [62]       |
|                     | Ni/NC                                    | 350                      | 54          | [62]       |
|                     | RuO <sub>2</sub>                         | 357                      | 58          | [62]       |
|                     | CoSe <sub>2</sub> /DETA                  | 392                      | 83          | [63]       |
|                     | Co <sub>2</sub> B                        | 373                      | 80          | [63]       |
|                     | Co <sub>2</sub> B/CoSe <sub>2</sub>      | 320                      | 56          | [63]       |
|                     | Cu(OH) <sub>2</sub>                      | 470                      | 78.9        | [70]       |
|                     | MWCNT/Cu(OH) <sub>2</sub>                | 530                      | 127.9       | [70]       |
|                     | MWCNT/CuO-400                            | 420                      | 59.9        | [70]       |
|                     | NiFe/Cu <sub>2</sub> O NWs/CF            | 215                      | 42          | [71]       |
|                     | Cu <sub>2</sub> O NWs/CF                 | 320                      | 48          | [71]       |
|                     | Fe(OH) <sub>3</sub> :Cu(OH) <sub>2</sub> | 365                      | 42          | [66]       |
|                     | Cu(OH) <sub>2</sub> @NiFe-LDH            | 283                      | 88          | [72]       |
|                     | CuO/Fe-Co <sub>3</sub> O <sub>4</sub>    | 232                      |             | [73]       |
|                     | CuO/Co <sub>3</sub> O <sub>4</sub>       | 227                      |             | [74]       |
|                     | 3D-OMNiSA                                | 254                      | 39          | [25]       |

## Calculation of magnetic field gradient profile of one-dimensional nanotube bodies

The stray magnetic field emanating from a periodic array is easily obtained from Fourier transformation of Maxwell's equations [38, 45]:

$$B_{1,x}(x,z_0) = \frac{u_0 M h d}{a} \sum_{n=1}^{\infty} q_n F(q_n) e^{-q_n \left(z_0 + \frac{h}{2}\right)} \sin(q_n - \theta),$$

$$B_{1,y}(x,z_0) = 0$$

$$B_{1,z}(x,z_0) = \frac{u_0 M h d}{a} \sum_{n=1}^{\infty} q_n F(q_n) e^{-q_n \left(z_0 + \frac{h}{2}\right)} \cos(q_n - \theta),$$

where  $q_n = 2\pi n/a$ ,  $a$  is the period of the array,  $h$  the height of the cobalt fingers and  $d$  their width,  $\theta$  is the tilt angle of the magnetization and

$$F(q_n) = \frac{\sin\left(\frac{q_n d}{2}\right) \sinh\left(\frac{q_n h}{2}\right)}{\left(\frac{q_n d}{2}\right) \left(\frac{q_n h}{2}\right)},$$

Because the electron's motion is limited to the plane, the magnetic effects depend only on the component of the perpendicular magnetic field component  $B_{1,z}(x,z_0)$ , which is plotted in **Fig. 10**.
